# Supplementary material for: Electrocatalytic NO reduction to NH3 over TiS2 nanosheets
Source: Royal Society of Chemistry journal article supplement (doi:10.1039/d3nj03532h), 2023-01-01
Supplement: d3nj03532h1.pdf [file d3nj03532h1.pdf]

# Supporting Information

## Electrocatalytic NO reduction to NH<sub>3</sub> over TiS<sub>2</sub> nanosheets

Xiangli Wang<sup>1\*</sup>, Lan Yang<sup>1</sup>, Guike Zhang<sup>2</sup>, Ke Chu<sup>2</sup>

<sup>1</sup> College of Electrical Engineering, Northwest MinZu University, Lanzhou 730030, China

<sup>2</sup> School of Materials Science and Engineering, Lanzhou Jiaotong University, Lanzhou 730070,  
China

\*Corresponding author. wxl2002wxl@163.com (X.L. Wang)

## Experimental Section

### Materials

TiS<sub>2</sub> powder ( $\geq 99.9$  wt%), C<sub>3</sub>H<sub>8</sub>O ( $\geq 99.9\%$ ), C<sub>2</sub>H<sub>2</sub>O<sub>4</sub>·2H<sub>2</sub>O ( $\geq 99.9\%$ ), C<sub>7</sub>H<sub>6</sub>O<sub>3</sub> ( $\geq 99.5\%$ ), C<sub>6</sub>H<sub>5</sub>Na<sub>3</sub>O<sub>7</sub> ( $\geq 99.5\%$ ), LiF ( $\geq 99.9\%$ ), LiClO<sub>4</sub> ( $\geq 99.9\%$ ), HCl (37%) and Nafion (5 wt%) were obtained from Sinopharm Chemical Reagent Co., Ltd. Na<sub>2</sub>MoO<sub>4</sub>·2H<sub>2</sub>O ( $\geq 99.5\%$ ), C<sub>4</sub>H<sub>4</sub>O<sub>6</sub>KNa·4H<sub>2</sub>O ( $\geq 99.9\%$ ), NaClO ( $\geq 99.9\%$ ), C<sub>9</sub>H<sub>11</sub>NO ( $\geq 99.5\%$ ), C<sub>5</sub>FeN<sub>6</sub>Na<sub>2</sub>O ( $\geq 99.0\%$ ), C<sub>12</sub>H<sub>14</sub>N<sub>2</sub>·2HCl ( $\geq 99.0\%$ ), N<sub>2</sub>H<sub>4</sub> ( $\geq 99.9\%$ ), H<sub>2</sub>SO<sub>4</sub> (98%), NH<sub>4</sub>Cl ( $\geq 99.5\%$ ), SO<sub>2</sub>(NH<sub>2</sub>)<sub>2</sub> ( $\geq 99.5\%$ ), D<sub>2</sub>O ( $\geq 99.9\%$ ) and DMSO ( $\geq 99.0\%$ ) were purchased from Sigma-Aldrich Chemical Reagent Co., Ltd.

### Synthesis of TiS<sub>2</sub>

TiS<sub>2</sub> was synthesized using a facile liquid exfoliation method. Initially, bulk TiS<sub>2</sub> powders were dissolved in isopropyl alcohol and the initial concentration was 7.5 mg/mL. The mixed solution was sonicated for 90 minutes and then the dispersions were allowed to stand for 24 h. Afterwards, the mixture was centrifuged at 1500 rpm for 2 h to collect the precipitate and dried to produce TiS<sub>2</sub>.

### Electrochemical experiment

Electrochemical measurements were conducted under ambient conditions on a CHI-760E electrochemical workstation. The graphite rod, Ag/AgCl, and CC-loaded catalyst served as the reference, counter, and working electrodes, respectively. All potentials were referenced to reversible hydrogen electrode (RHE) by  $E$  (V vs. RHE) =  $E$  (V vs. Ag/AgCl) + 0.198 V + 0.059 × pH. The electrocatalytic NORR measurements were conducted within a gas-tight H-cell, using NO-saturated 0.5 M Na<sub>2</sub>SO<sub>4</sub> electrolyte. Before NORR testing, the feeding gases were purified using two glass bubblers filled with 4 M KOH solution[1]. Furthermore, the cathodic compartment was flushed with Ar for a minimum of 30 minutes to eliminate any remaining oxygen. Throughout the NORR electrolysis process, a continuous flow of NO (99.9%) gas was introduced into the cathodic chamber at a rate of 20 mL min<sup>-1</sup>. Subsequent to an hour of electrolysis, both the aqueous and gaseous products were identified using colorimetric methods and gas chromatography (GC), respectively.

### Determination of NH<sub>3</sub>

The generated NH<sub>3</sub> was determined by the indophenol blue method[2]. Typically, 0.5 mL electrolyte was removed from the electrochemical reaction vessel and diluted 10 times with deionized water. Then 2 mL diluted solution was removed into a clean vessel followed by sequentially adding NaOH solution (2 mL, 1 M) containing C<sub>7</sub>H<sub>6</sub>O<sub>3</sub> (5 wt.%) and C<sub>6</sub>H<sub>5</sub>Na<sub>3</sub>O<sub>7</sub> (5 wt.%), NaClO (1 mL, 0.05 M), and C<sub>5</sub>FeN<sub>6</sub>Na<sub>2</sub>O (0.2 mL, 1wt.%) aqueous solution. After the incubation for 2 h at room temperature, the mixed solution was subjected to UV-vis measurement using the absorbance at 655 nm wavelength. The concentration-absorbance curves were calibrated by the standard NH<sub>4</sub>Cl solution with a series of concentrations, and the NH<sub>3</sub> yield rate and NH<sub>3</sub>-Faradaic efficiency (FE<sub>NH3</sub>) were calculated by the following equation[1]:

$$\text{NH}_3 \text{ yield rate} = (c \times V) / (17 \times t \times A) \quad (1)$$

NH<sub>3</sub>-Faradaic efficiency (FE<sub>NH3</sub>) was calculated by the following equation:

$$\text{FE}_{\text{NH}_3} = (5 \times F \times c \times V) / (17 \times Q) \times 100\% \quad (2)$$

where  $c$  ( $\mu\text{g mL}^{-1}$ ) is the measured NH<sub>3</sub> concentration,  $V$  (mL) is the volume of electrolyte in the cathode chamber,  $t$  (s) is the electrolysis time and  $A$  is the surface area of CC ( $1 \times 1 \text{ cm}^2$ ),  $F$  ( $96500 \text{ C mol}^{-1}$ ) is the Faraday constant,  $Q$  (C) is the total quantity of applied electricity.

The detailed procedures for colorimetric determination of N<sub>2</sub>H<sub>4</sub> was provided in our previous publication[3].

### Characterizations

X-ray diffraction (XRD) was performed on a Rigaku D/max 2400 diffractometer. Transmission electron microscopy (TEM) and high-resolution transmission electron microscopy (HRTEM) were performed on a Tecnai G<sup>2</sup> F20 microscope. X-ray photoelectron spectroscopy (XPS) analysis was collected on a PHI 5702 spectrometer.

### Calculation details

Spin-polarized density functional theory (DFT) calculations were carried out using the Cambridge sequential total energy package (CASTEP) with projector augmented wave pseudopotentials. The Perdew-Burke-Ernzerhof (PBE) generalized gradient approximation (GGA) functional was used for the exchange-correlation

potential. The van der Waals interaction was described by using the empirical correction in Grimme's scheme (DFT+D). During the geometry optimization, the electron wave functions were expanded using plane waves with a cutoff energy of 500 eV. The convergence tolerance was set to be  $1.0 \times 10^{-5}$  eV for energy and  $0.02 \text{ eV \AA}^{-1}$  for force. The  $4 \times 4 \times 1$  Monkhorst-Pack mesh was used in Brillouin zone sampling.  $\text{TiS}_2$  (011) was modeled by a  $4 \times 4$  supercell, and a vacuum region of  $15 \text{ \AA}$  was used to separate adjacent slabs.

The adsorption energy ( $\Delta E$ ) is defined as[4]

$$\Delta E = E_{\text{ads/slab}} - E_{\text{ads}} - E_{\text{slab}} \quad (3)$$

where  $E_{\text{ads/slab}}$ ,  $E_{\text{ads}}$  and  $E_{\text{slab}}$  are the total energies for adsorbed species on slab, adsorbed species and isolated slab, respectively.

The Gibbs free energy ( $\Delta G$ , 298 K) of reaction steps is calculated by[4]

$$\Delta G = \Delta E + \Delta ZPE - T\Delta S \quad (4)$$

where  $\Delta E$  is the adsorption energy,  $\Delta ZPE$  is the zero-point energy difference and  $T\Delta S$  is the entropy difference between the gas phase and adsorbed state.

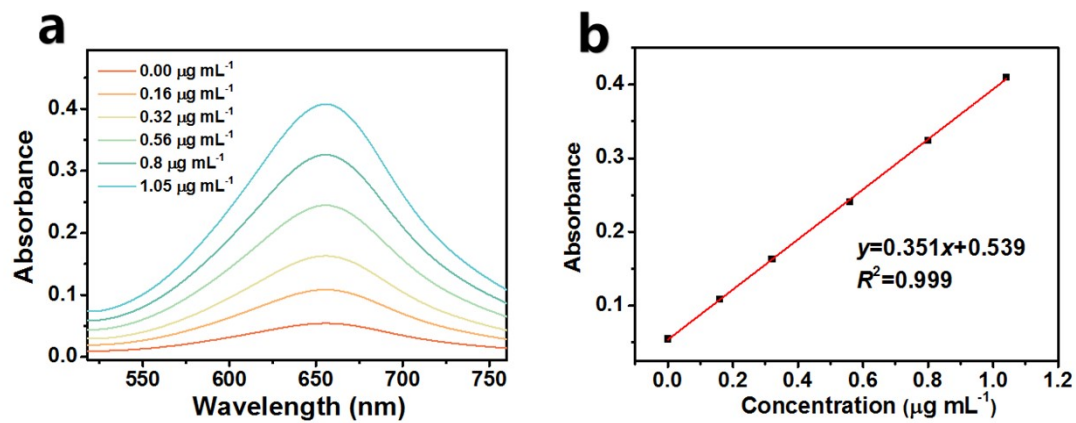

Fig. S1. (a) UV-vis absorption spectra of  $\text{NH}_4\text{Cl}$  assays after incubated for 2 h at ambient conditions. (b) Calibration curve used for the calculation of  $\text{NH}_3$  concentrations.

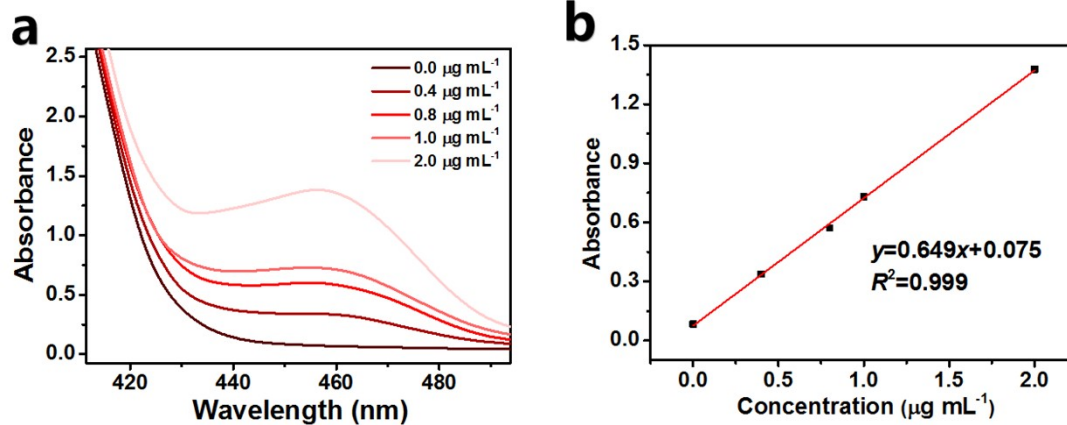

Fig. S2. (a) UV-vis absorption spectra of  $N_2H_4$  assays after incubated for 20 min at ambient conditions. (b) Calibration curve used for calculation of  $N_2H_4$  concentrations.

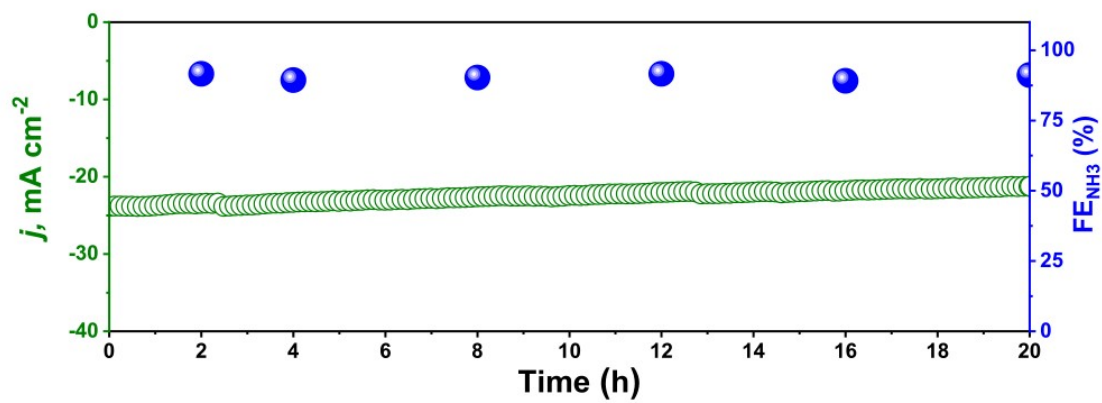

Fig. S3. Long-term chronoamperometry test of  $\text{TiS}_2$  for 20 h at -0.6 V.

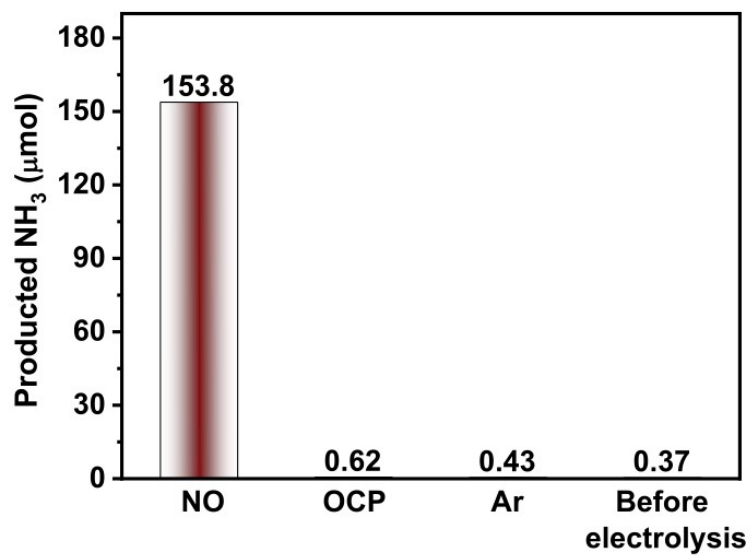

Fig. S4. Amounts of produced NH<sub>3</sub> over TiS<sub>2</sub> under different conditions at -0.6 V.



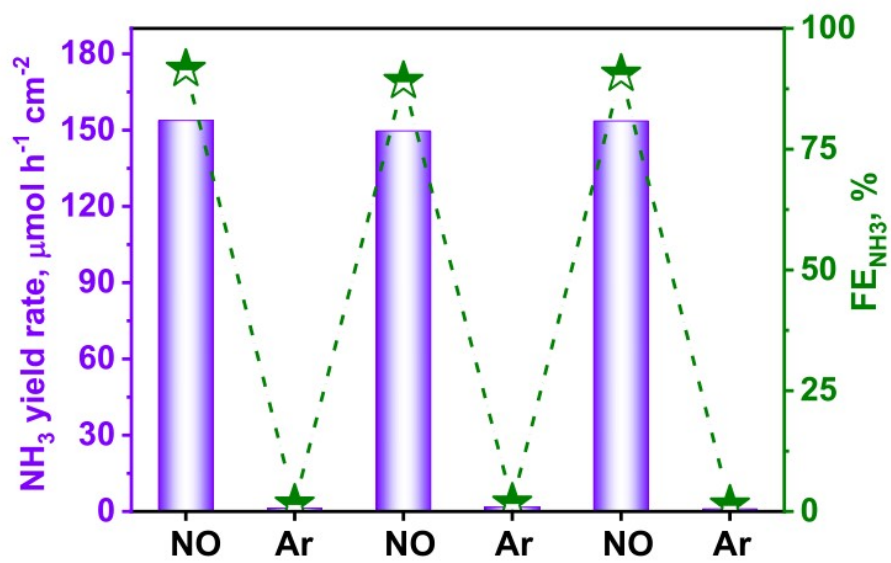

Fig. S5. NO-Ar gas switching experiment on TiS<sub>2</sub> at -0.6 V.

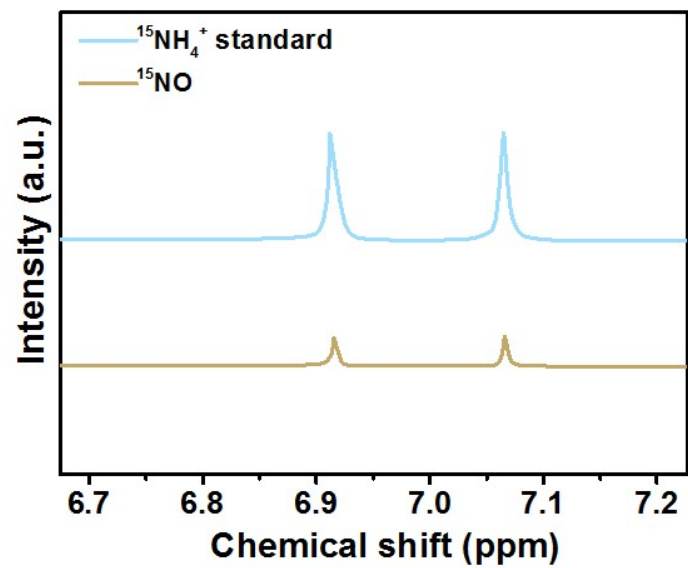

Fig. S6.  $^1\text{H}$  NMR spectra of  $^{15}\text{NH}_4^+$  standard sample and those fed by  $^{15}\text{NO}$  after NORR electrolysis on  $\text{TiS}_2$  at -0.6 V.

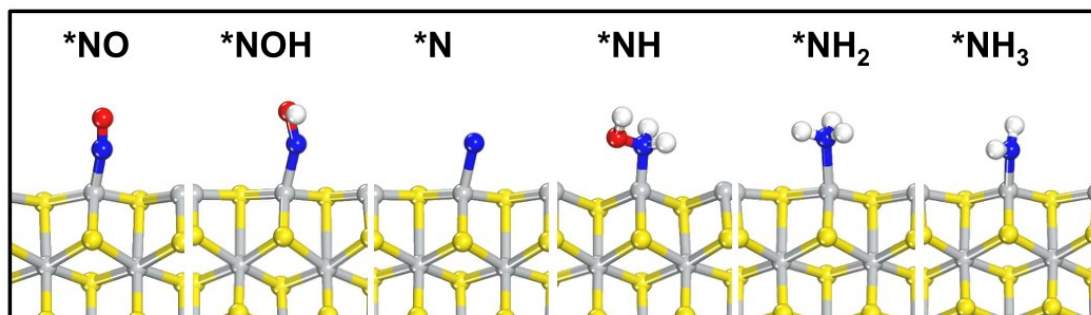

Fig. S7. Optimized structures of the reaction intermediates for NOH pathway on TiS<sub>2</sub>.

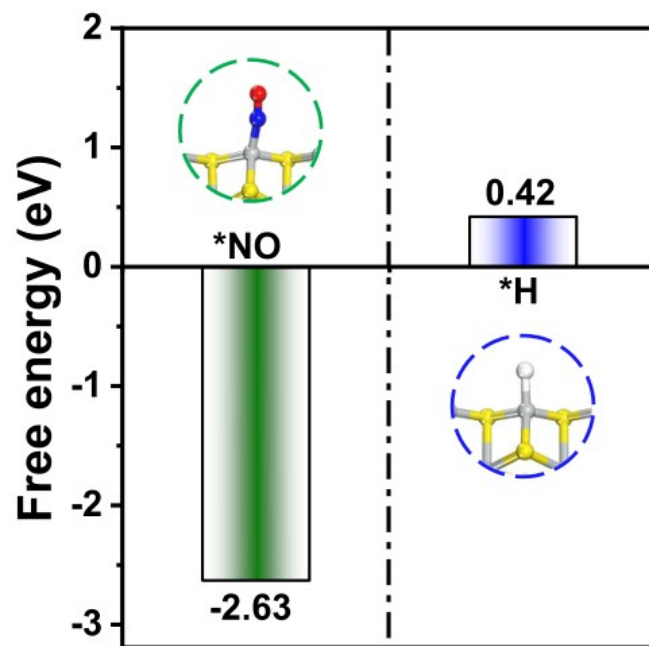

Fig. S8. Comparison of the \*H/\*NO binding free energies on  $\text{TiS}_2$ .

Table S1. Comparison of the optimum NH<sub>3</sub> yield rate and NH<sub>3</sub>-Faradic efficiency (FE<sub>NH3</sub>) for recently reported NORR electrocatalysts at ambient conditions.

| Catalyst                                  | Electrolyte                               | NH <sub>3</sub> yield rate<br>( $\mu\text{mol h}^{-1} \text{cm}^{-2}$ ) | FE <sub>NH3</sub> | Potential<br>(V vs. RHE) | Ref.             |
|-------------------------------------------|-------------------------------------------|-------------------------------------------------------------------------|-------------------|--------------------------|------------------|
| FeP/CC                                    | 0.2 M PBS                                 | 85.62                                                                   | 88.49%            | -0.2                     | [5]              |
| NiO/TM                                    | 0.1 M Na <sub>2</sub> SO <sub>4</sub>     | 125.3                                                                   | 90%               | -0.6                     | [6]              |
| Ni <sub>2</sub> P/CP                      | 0.1 M HCl                                 | 33.47                                                                   | 76.9%             | -0.2                     | [7]              |
| a-B <sub>2.6</sub> C@TiO <sub>2</sub> /Ti | 0.1 M Na <sub>2</sub> SO <sub>4</sub>     | 216.4                                                                   | 87.6%             | -0.9                     | [8]              |
| Ru <sub>0.05</sub> Cu <sub>0.95</sub>     | 0.05 M Na <sub>2</sub> SO <sub>4</sub>    | 17.68                                                                   | 64.9%             | -0.5                     | [9]              |
| Bi NDs                                    | 0.1 M Na <sub>2</sub> SO <sub>4</sub>     | 70.2                                                                    | 89.2%             | -0.5                     | [10]             |
| MoC/NCS                                   | 0.1 M HCl                                 | 79.4                                                                    | 89%               | -0.8                     | [11]             |
| CoP/TM                                    | 0.2 M Na <sub>2</sub> SO <sub>4</sub>     | 47.22                                                                   | 88.3%             | -0.2                     | [12]             |
| MoS <sub>2</sub> /GF                      | 0.1 M HCl                                 | 99.6                                                                    | 76.6%             | 0.1                      | [1]              |
| CoS <sub>1-x</sub>                        | 0.2 M Na <sub>2</sub> SO <sub>4</sub>     | 44.67                                                                   | 53.62%            | -0.4                     | [13]             |
| Mo <sub>2</sub> C                         | 0.5 M Na <sub>2</sub> SO <sub>4</sub>     | 122.7                                                                   | 86.3%             | -0.4                     | [3]              |
| HCNF                                      | 0.2 M Na <sub>2</sub> SO <sub>4</sub>     | 22.35                                                                   | 88.33%            | -0.6                     | [14]             |
| <b>TiS<sub>2</sub></b>                    | <b>0.5 M Na<sub>2</sub>SO<sub>4</sub></b> | <b>153.8</b>                                                            | <b>91.6%</b>      | <b>-0.6</b>              | <b>This work</b> |

## References

- [1]. L. Zhang, J. Liang, Y. Wang, T. Mou, Y. Lin, L. Yue, T. Li, Q. Liu, Y. Luo, N. Li, B. Tang, Y. Liu, S. Gao, A. A. Alshehri, X. Guo, D. Ma and X. Sun, *Angew. Chem. Int. Edit.*, 2021, **60**, 25263-25268.
- [2]. P. Li, Z. Jin, Z. Fang and G. Yu, *Energy Environ. Sci.*, 2021, **14**, 3522-3531.
- [3]. K. Chen, P. Shen, N. Zhang, D. Ma and K. Chu, *Inorg. Chem.*, 2023, **62**, 653-658.
- [4]. G. Zhang, Y. Wan, H. Zhao, Y.-L. Guo and K. Chu, *Dalton Trans.*, 2023, **52**, 6248-6253.
- [5]. J. Liang, Q. Zhou, T. Mou, H. Chen, L. Yue, Y. Luo, Q. Liu, M. S. Hamdy, A. A. Alshehri, F. Gong and X. Sun, *Nano Res.*, 2022, **15**, 4008-4013.
- [6]. P. Liu, J. Liang, J. Wang, L. Zhang, J. Li, L. Yue, Y. Ren, T. Li, Y. Luo, N. Li, B. Tang, Q. Liu, A. M. Asiri, Q. Kong and X. Sun, *Chem. Commun.*, 2021, **57**, 13562-13565.
- [7]. T. Mou, J. Liang, Z. Ma, L. Zhang, Y. Lin, T. Li, Q. Liu, Y. Luo, Y. Liu, S. Gao, H. Zhao, A. M. Asiri, D. Ma and X. Sun, *J. Mater. Chem. A*, 2021, **9**, 24268-24275.
- [8]. J. Liang, P. Liu, Q. Li, T. Li, L. Yue, Y. Luo, Q. Liu, N. Li, B. Tang, A. A. Alshehri, I. Shakir, P. O. Agboola, C. Sun and X. Sun, *Angew. Chem. Int. Ed.*, 2022, **61**, e202202087.
- [9]. J. Shi, C. Wang, R. Yang, F. Chen, N. Meng, Y. Yu and B. Zhang, *Sci. China Chem.*, 2021, **64**, 1493-1497.
- [10]. Y. Lin, J. Liang, H. Li, L. Zhang, T. Mou, T. Li, L. Yue, Y. Ji, Q. Liu, Y. Luo, N. Li, B. Tang, Q. Wu, M. S. Hamdy, D. Ma and X. Sun, *Mater. Today Phys.*, 2022, **22**, 100611.
- [11]. G. Meng, M. Jin, T. Wei, Q. Liu, S. Zhang, X. Peng, J. Luo and X. Liu, *Nano Res.*, 2022, **15**, 8890-8896.
- [12]. J. Liang, W.-F. Hu, B. Song, T. Mou, L. Zhang, Y. Luo, Q. Liu, A. A. Alshehri, M. S. Hamdy, L.-M. Yang and X. Sun, *Inorg. Chem. Front.*, 2022, **9**, 1366-1372.
- [13]. L. Zhang, Q. Zhou, J. Liang, L. Yue, T. Li, Y. Luo, Q. Liu, N. Li, B. Tang, F. Gong, X. Guo and X. Sun, *Inorg. Chem.*, 2022, **61**, 8096-8102.
- [14]. L. Ouyang, Q. Zhou, J. Liang, L. Zhang, L. Yue, Z. Li, J. Li, Y. Luo, Q. Liu, N. Li, B. Tang, A. Ali Alshehri, F. Gong and X. Sun, *J. Colloid Interface Sci.*, 2022, **616**, 261-267.
